# Supplementary material for: Coordination Chemistry in magnesium battery electrolytes: how ligands affect their performance
Source: PubMed Central journal article supplement — Sci Rep. 2013 Nov 4;3:3130. doi: 10.1038/srep03130 (PMC3816293; doi:10.1038/srep03130), 2013-11-04
Supplement: srep03130-s1.pdf [file srep03130-s1.pdf]

## **Supplementary Information**

### **Coordination Chemistry in magnesium battery electrolytes: how ligands affect their performance**

Yuyan Shao\*, Tianbiao Liu, Guosheng Li, Meng Gu, Zimin Nie, Mark Engelhard, Jie Xiao,  
Dongping Lu, Chongmin Wang, Ji-Guang Zhang, Jun Liu\*

Pacific Northwest National Laboratory, Richland WA, 99352, USA

\* Correspondence and requests for materials should be addressed to J.L. (email:  
jun.liu@pnnl.gov) or to Y.Y.S. (email: yuyan.shao@pnnl.gov).

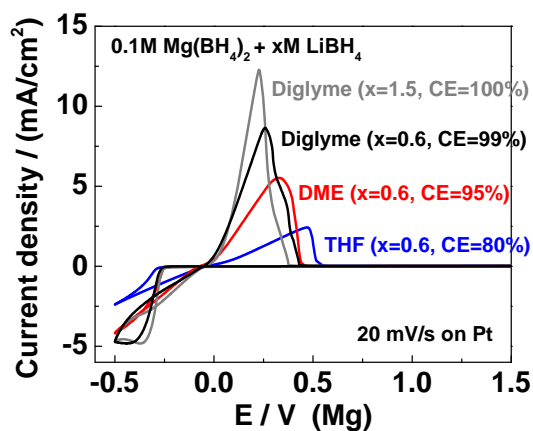

(a)

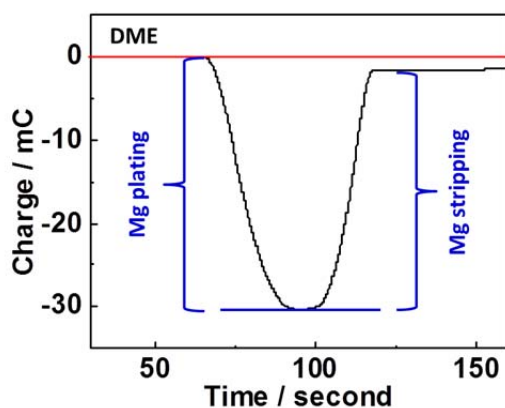

(b)

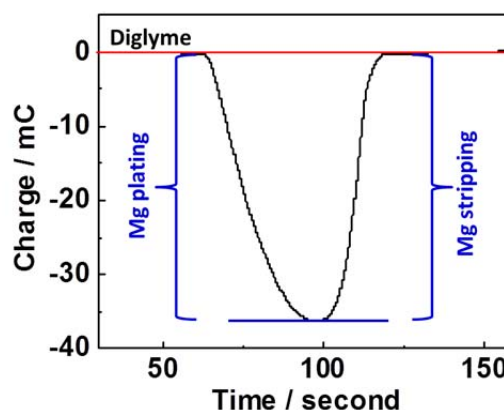

(c)

**Figure S1.** (a) CVs recorded on Pt electrodes in the electrolytes by dissolving  $\text{Mg}(\text{BH}_4)_2/\text{LiBH}_4$  in diglyme, DME, and THF. Diglyme shows much better performance (higher current density, 100% coulombic efficiency). (b, c) The charge vs time curves on Pt electrode during Mg plating/stripping in  $0.1\text{M Mg}(\text{BH}_4)_2-0.6\text{M LiBH}_4/\text{DME}$  (b) and  $0.1\text{M Mg}(\text{BH}_4)_2-1.5\text{M LiBH}_4/\text{Diglyme}$  (c); The curves show the coulombic efficiency of 95% (b) and 100% (c) for  $0.1\text{M Mg}(\text{BH}_4)_2-1.5\text{M LiBH}_4/\text{Diglyme}$  and  $0.1\text{M Mg}(\text{BH}_4)_2-0.6\text{M LiBH}_4/\text{DME}$  respectively.

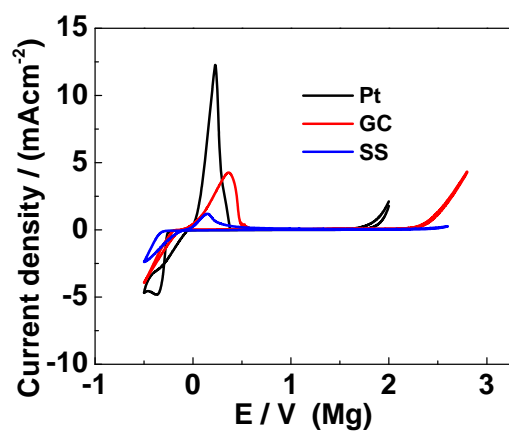

**Figure S2.** CVs recorded on Pt, glass carbon (GC) and stainless steel (SS) electrodes in the electrolyte,  $\text{Mg}(\text{BH}_4)_2\text{-LiBH}_4\text{-DGM}$  ( $[\text{LiBH}_4]=1.5 \text{ M}$ ). On GC and SS, anodic stability is observed over 2.0V (vs  $\text{Mg}/\text{Mg}^{2+}$ ).

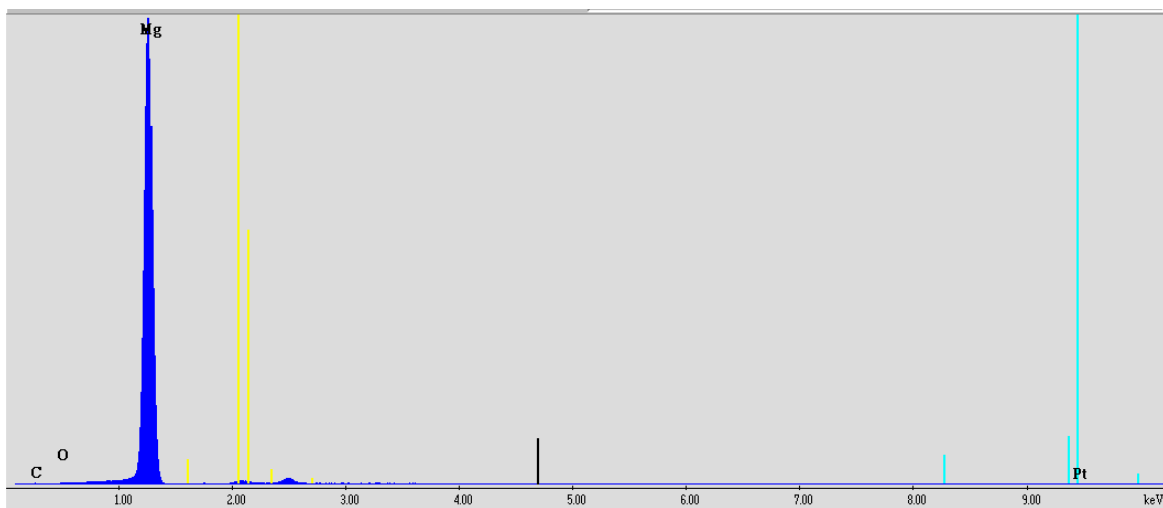

**Figure S3.** Energy-dispersive X-ray of an Mg sample plated from  $\text{Mg}(\text{BH}_4)_2\text{-LiBH}_4\text{-DGM}$  electrolyte with  $[\text{LiBH}_4]=1.5\text{M}$ .

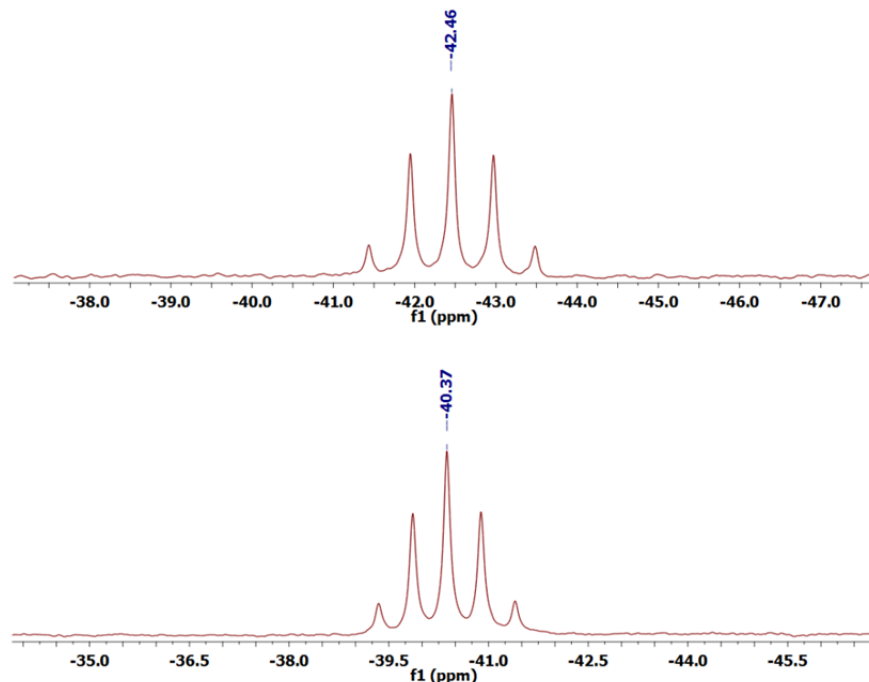

**Figure S4.**  $^{11}\text{B}$  NMR spectra of  $\text{Mg}(\text{BH}_4)_2\text{DGM}$  (a) and  $\text{Mg}_2(\text{BH}_4)_4(\text{DME})_3$  (b) recorded at  $22^\circ\text{C}$  in  $\text{CD}_2\text{Cl}_2$ . Chemical shift values labeled at the top of resonances.

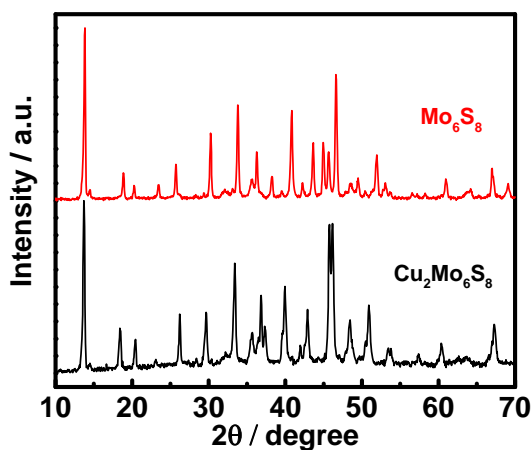

**Figure S5.** XRD patterns of  $\text{Cu}_2\text{Mo}_6\text{S}_8$  and  $\text{Mo}_6\text{S}_8$  from molten salt synthesis. The XRD patterns are consistent with those in literature.<sup>1</sup>

#### References:

- 1 Lancry, E., Levi, E., Mitelman, A., Malovany, S. & Aurbach, D. Molten salt synthesis (MSS) of  $\text{Cu}_2\text{Mo}_6\text{S}_8$ - new way for large-scale production of chevrel phases. *J. Solid State Chem.* **179**, 1879-1882 (2006).
